# Supplementary material for: A synthetic defective interfering SARS-CoV-2
Source: PeerJ. 2021 Jul 1;9:e11686. doi: 10.7717/peerj.11686 (PMC8255065; doi:10.7717/peerj.11686)
Supplement: Supplemental Information 1 — Growth rates (absolute amount relative to the amount at 4 h) of WT in controls and in coinfections with DI or DI0; growth relative to controls at the same time point. Growth rates (absolute amount relative to the amount at 4 h) of WT in controls and in coinfections; growth relative to controls at the same time point; and detail at 24 h. Growth rates (absolute amount relative to the amount at 4 h) of WT and DI in coinfections; growth relative to that of WT in coinfections at the same time point; and detail at 24 h. [file peerj-09-11686-s001.xlsx]

## Sheet: 2a part 1
Control
4h	0.6	0.92	1.48
8h	4.33	0.69	4.1
12h	26.45	26.59	50.19
24h	11429	3686	9291	10319	5082	8157	3782	6592	3154
Coinfection with DI
4h	0.7	0.87	1.43
8h	6.65	0.2	2.69
12h	26.88	23.14	26.2
24h	1679	2898	4799	2496	4597	3528	6446	5256	4929	2146	2787	3949

## Sheet: 2a part 2
Control
4h	0.6	0.92	1.48
8h	1.42434	0.226974	1.34868
12h	0.768672	0.77274	1.45859
24h	1.67275	0.539485	1.35984	1.51029	0.743804	1.19386	0.553535	0.964808	0.461621
Coinfection with DI
4h	0.7	0.87	1.43
8h	2.1875	0.0657895	0.884868
12h	0.781168	0.672479	0.761407
24h	0.245739	0.424153	0.702384	0.365316	0.672819	0.51636	0.94344	0.769271	0.721411	0.31409	0.407907	0.577978

## Sheet: 2a part 3
Control at 24h
relative number	11429	3686	9291	10319	5082	8157	3782	6592	3154	10885	2931	8795
relative growth	1.67275	0.539485	1.35984	1.51029	0.743804	1.19386	0.553535	0.964808	0.461621	1.59305	0.428922	1.28719
Coinfection with DI at 24h
relative number	1679	2898	4799	2496	4597	3528	6446	5256	4929	2146	2787	3949
relative growth	0.245739	0.424153	0.702384	0.365316	0.672819	0.51636	0.94344	0.769271	0.721411	0.31409	0.407907	0.577978
Coinfection with DI0 at 24h
relative number	6846	1628	18831
relative growth	1.00197	0.238271	2.75606

## Sheet: 2b
DI	0.055101	0.0121705	0.0205763	0.0347558	0.0305405	0.0101637	0.0141475	0.0204168	0.025376	0.0111033	0.0225872	0.027247
WT	0.0656164	0.0284298	0.0167893	0.0334423	0.0150576	0.0249204	0.0122182	0.0172138	0.0154768	0.0353242	0.0290706	0.0235705

## Sheet: 2c part 1
Control
4h	0.73	1.04	1.22
8h	124	67	100
12h	648	519	452
24h	194	275	271
Coinfection with DI
4h	0.91	1.17	0.92
8h	133	197	103
12h	343	281	319
24h	73	135	177

## Sheet: 2c part 2
Control
4h	0.732441	1.04348	1.22408
8h	1.27835	0.690722	1.03093
12h	1.20074	0.961705	0.837554
24h	0.786486	1.11486	1.09865
Coinfection with DI
4h	0.913043	1.17391	0.923077
8h	1.37113	2.03093	1.06186
12h	0.635578	0.520692	0.591106
24h	0.295946	0.547297	0.717568

## Sheet: 2c part 4
WT
4h	0.96	1.15	0.89
8h	124	182	99
12h	314	260	290
24h	67	125	159
DI
4h	2.58	0.42	0.01
8h	40	226	96
12h	315	304	517
24h	201	448	509

## Sheet: 2c part 5
WT
4h	0.96	1.15	0.89
8h	0.918519	1.34815	0.733333
12h	1.09028	0.902778	1.00694
24h	0.57265	1.06838	1.35897
DI
4h	2.58	0.42	0.01
8h	0.296296	1.67407	0.711111
12h	1.09375	1.05556	1.79514
24h	1.71795	3.82906	4.35043
